# Supplementary material for: Catalytic N-oxidation of tertiary amines on RuO2NPs anchored graphene nanoplatelets
Source: Royal Society of Chemistry journal article supplement (doi:10.1039/c3cy00963g), 2014-01-01
Supplement: c3cy00963g1.pdf [file c3cy00963g1.pdf]

# **Catalytic N-oxidation of tertiary amines on RuO<sub>2</sub>NPs anchored graphene nanoplatelets**

**Mayakrishnan Gopiraman,<sup>a</sup> Hyunsik Bang,<sup>a</sup> Sundaram Ganesh Babu,<sup>a,d</sup> Kai Wei,<sup>\*</sup>**

**<sup>a,c</sup> Ramasamy Karvembu<sup>\*,b</sup> and Ick Soo Kim <sup>\*,a</sup>**

*<sup>a</sup>Nano Fusion Technology Research Lab, Interdisciplinary Graduate School of Science and Technology, Shinshu University, Ueda, Nagano–386 8567, Japan*

*<sup>b</sup>Department of Chemistry, National Institute of Technology, Tiruchirappalli–620 015, India*

*<sup>c</sup>College of Textile Clothing Engineering, Soochow University, Suzhou, 215021, China*

*<sup>d</sup>SRM Research Institute, SRM University, Kattankulathur 603203, India*

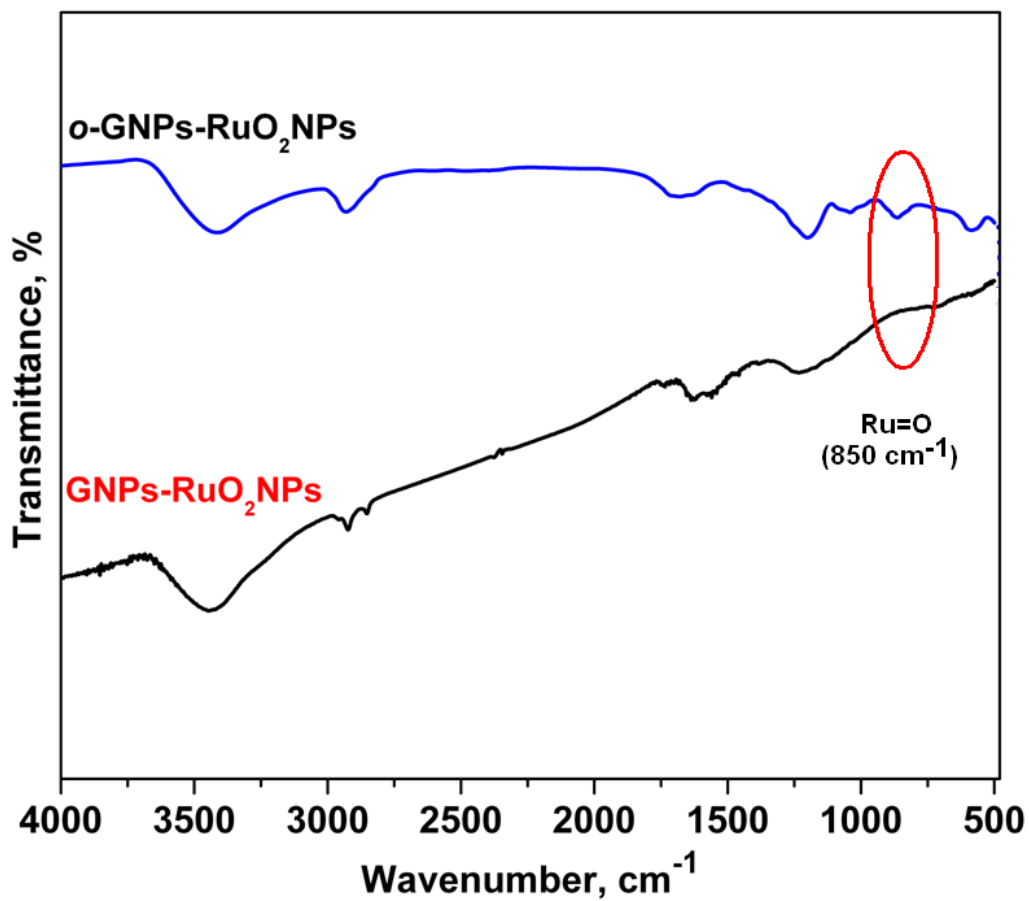

**Fig. S1.** FT-IR spectra of GNP-RuO<sub>2</sub>NPs and *o*-GNPs-RuO<sub>2</sub>NPs.

**$^1\text{H}$ -NMR,  $^{13}\text{C}$ -NMR and FT-IR spectra of products (N-oxides, Table 1)**

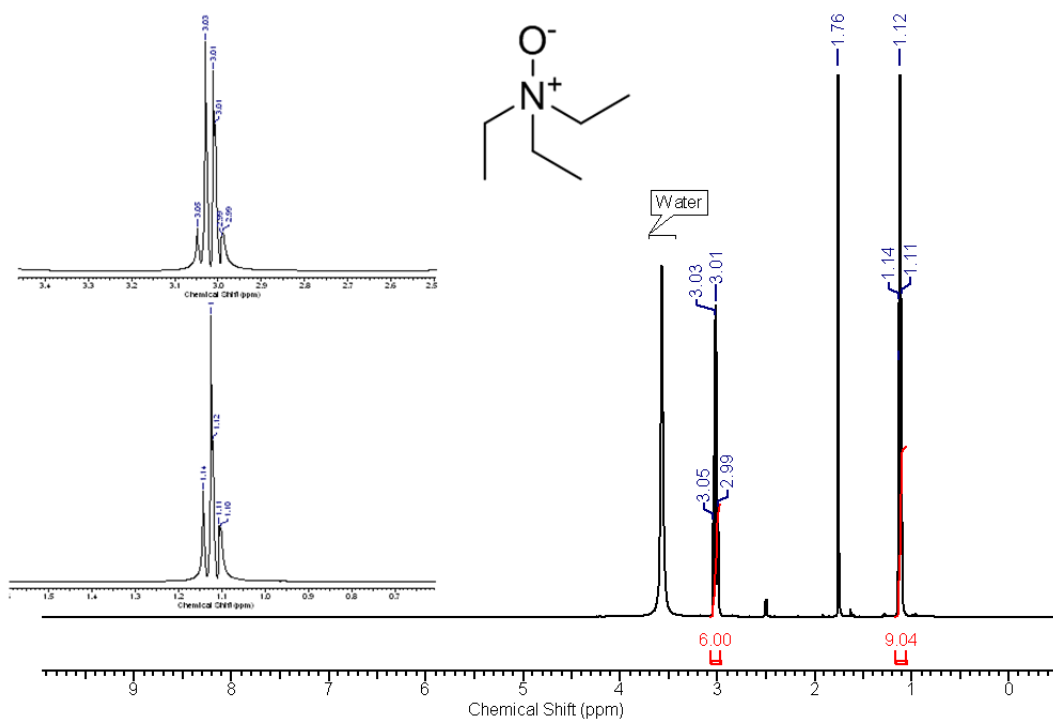

**Fig. S2**  $^1\text{H}$ -NMR spectrum of triethylamine N-oxide (Table 1, entry 1).

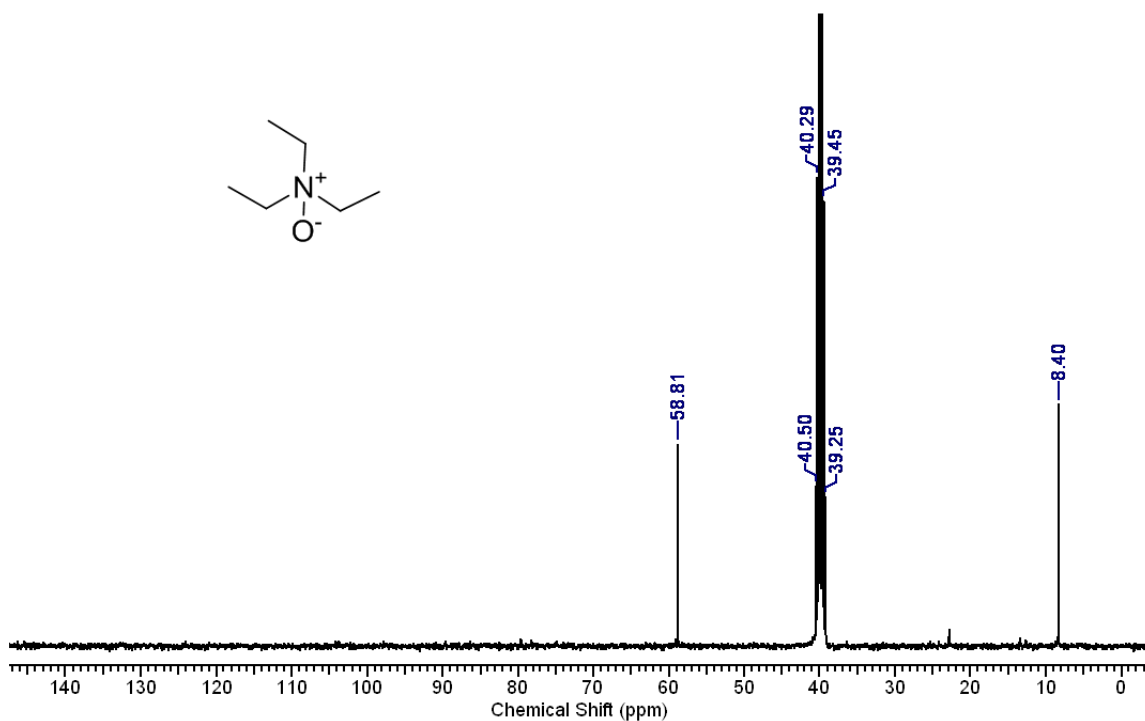

**Fig. S3**  $^{13}\text{C}$ -NMR spectrum of triethylamine N-oxide (Table 1, entry 1).

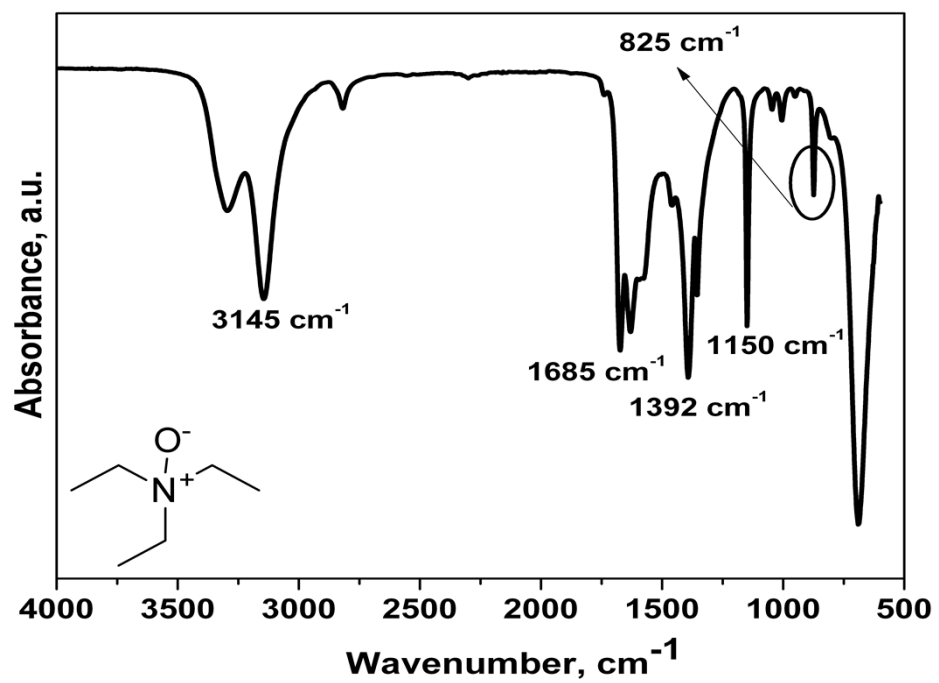

Fig. S4 FT-IR spectrum of triethylamine N-oxide (Table 1, entry 1).

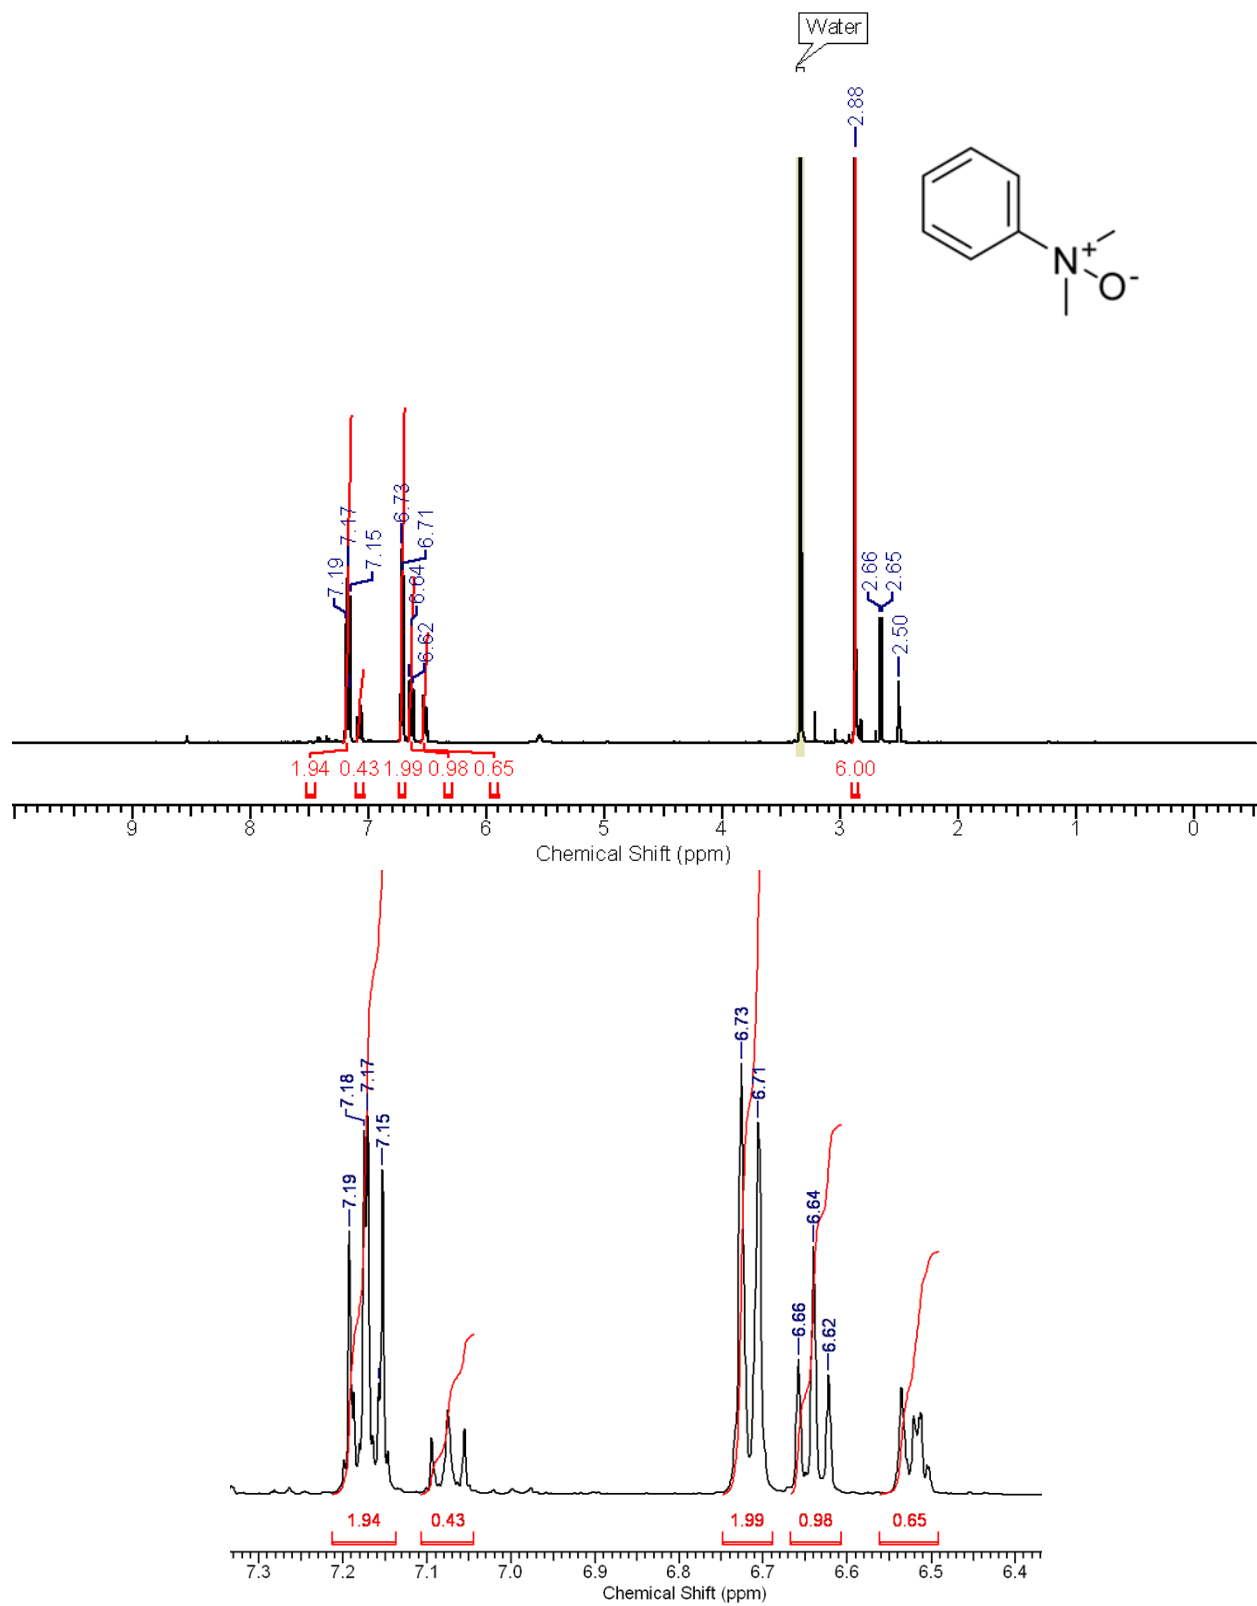

**Fig. S5**  $^1\text{H-NMR}$  spectrum of N,N-Dimethyl aniline N-oxide (Table 1, entry 2).

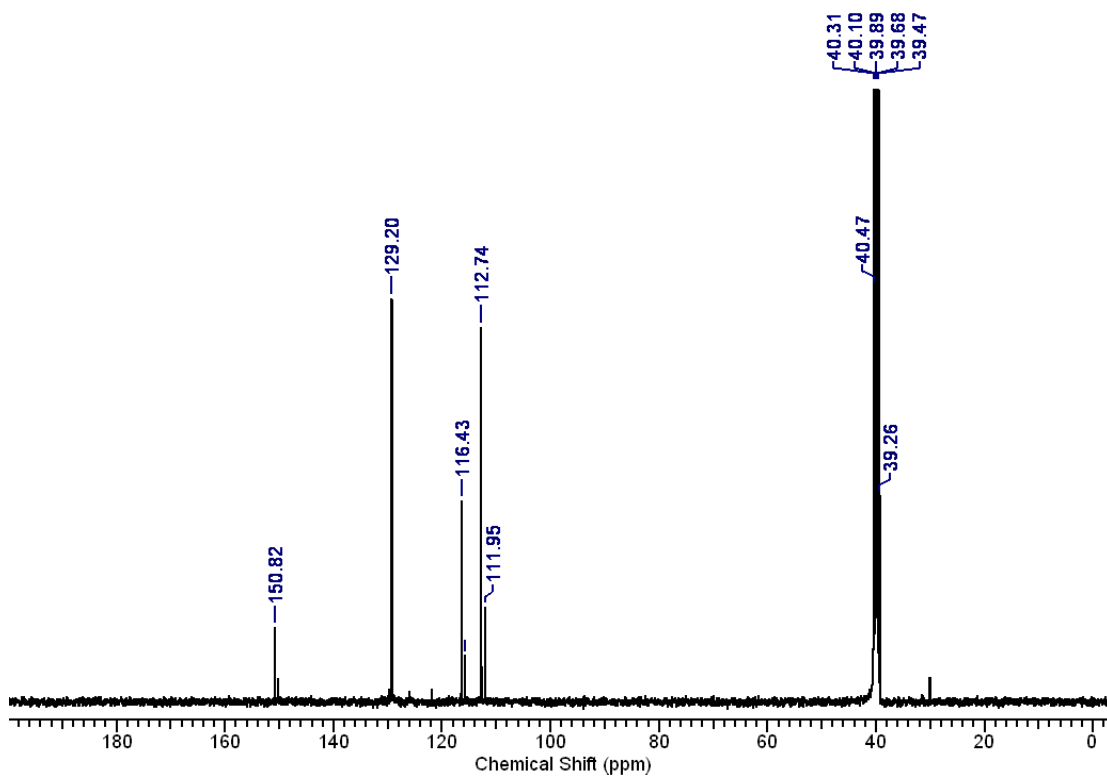

Fig. S6  $^{13}\text{C}$ -NMR spectrum of N,N-Dimethyl aniline N-oxide (Table 1, entry 2).

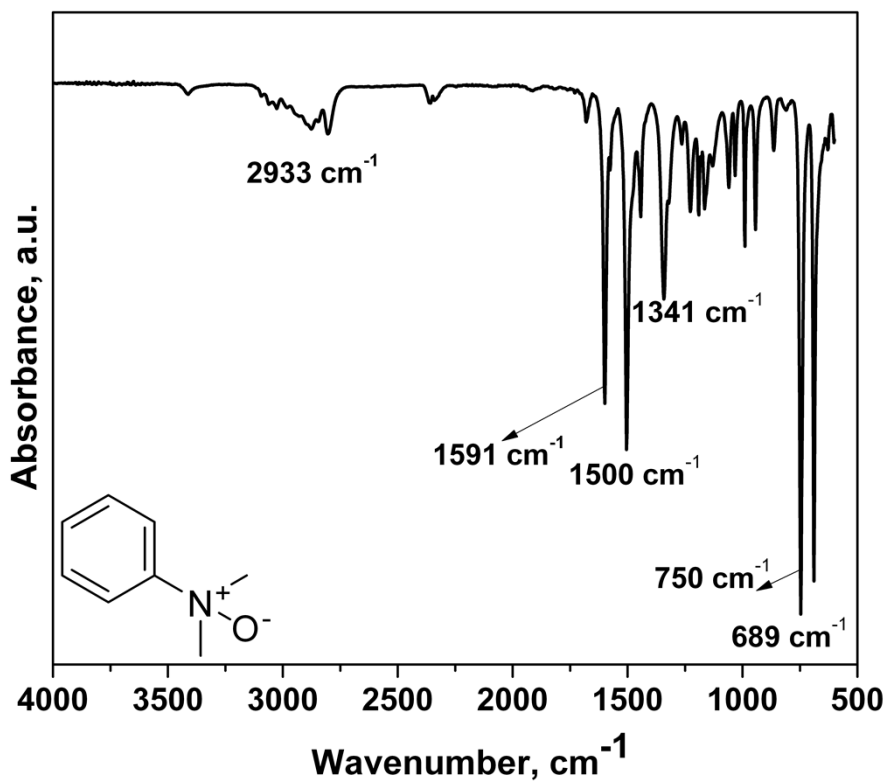

Fig. S7 FT-IR spectrum of N,N-Dimethyl aniline N-oxide (Table 1, entry 2).

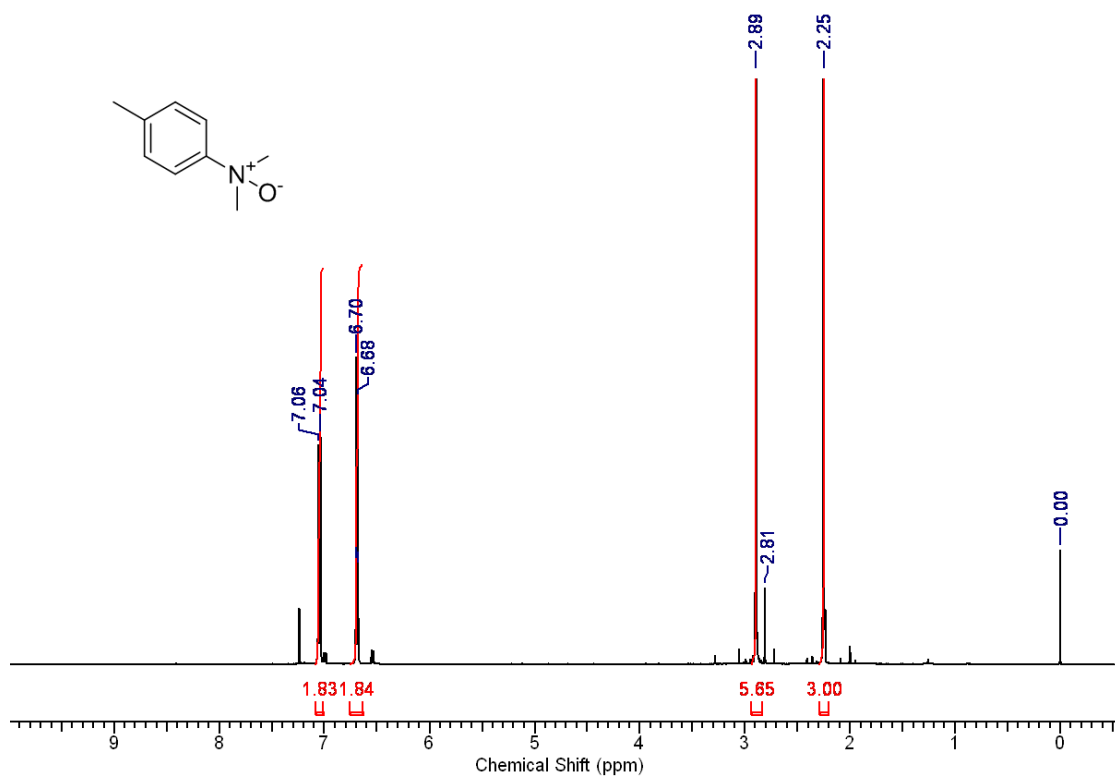

**Fig. S8**  $^1\text{H}$ -NMR spectrum of N,N-Dimethyl-p-toluidine N-oxide (Table 1, entry 3).

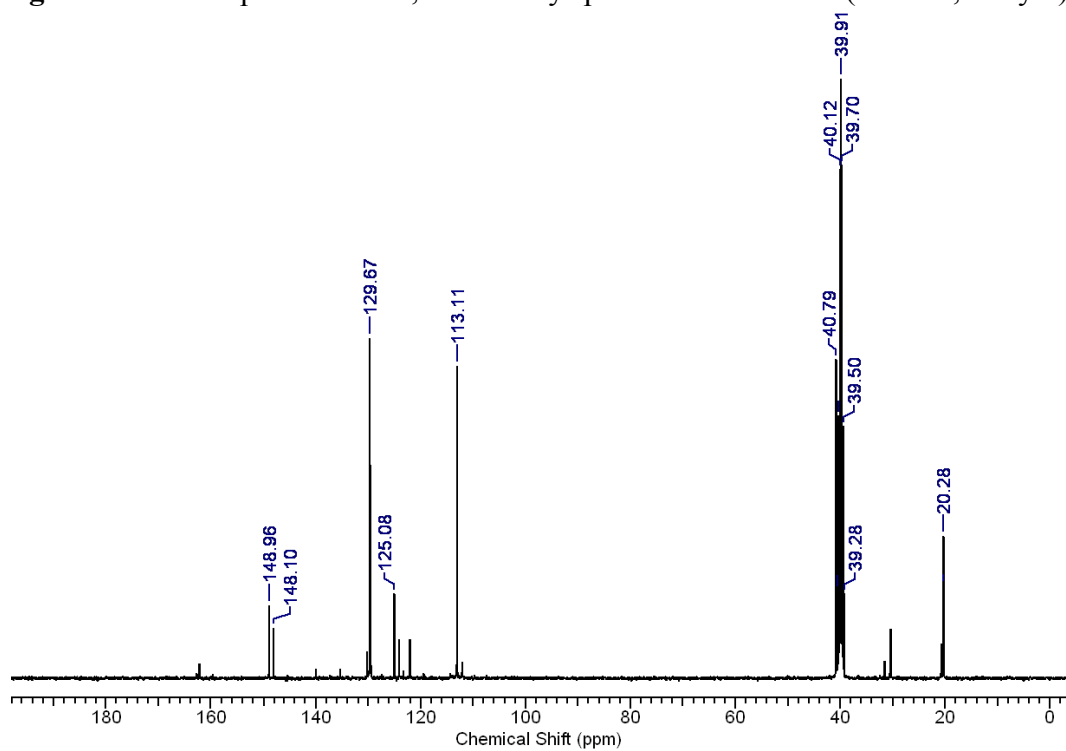

**Fig. S9**  $^{13}\text{C}$ -NMR spectrum of N,N-Dimethyl-p-toluidine N-oxide (Table 1, entry 3).

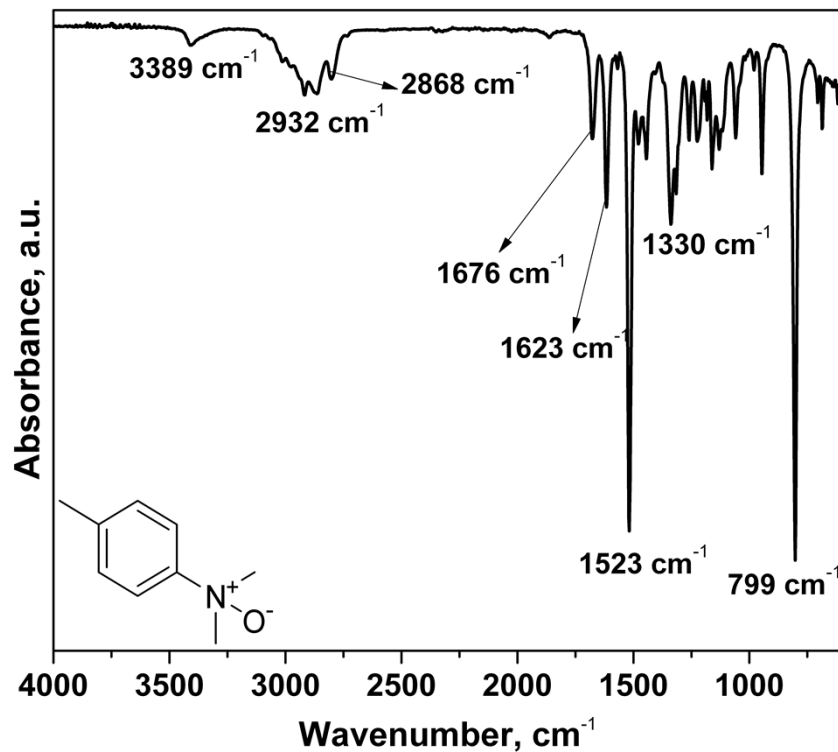

**Fig. S10** FT-IR spectrum of N,N-Dimethyl-p-toluidine N-oxide (Table 1, entry 3).



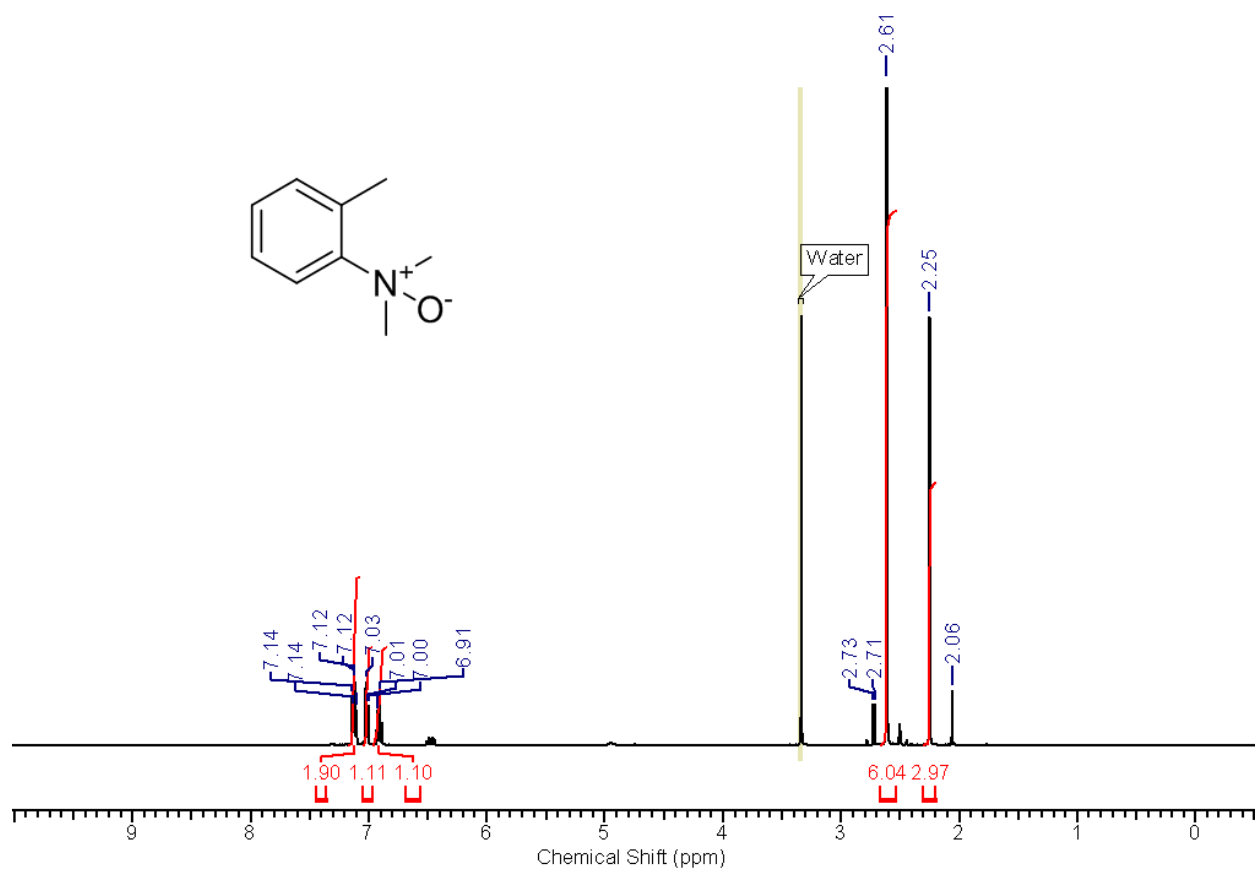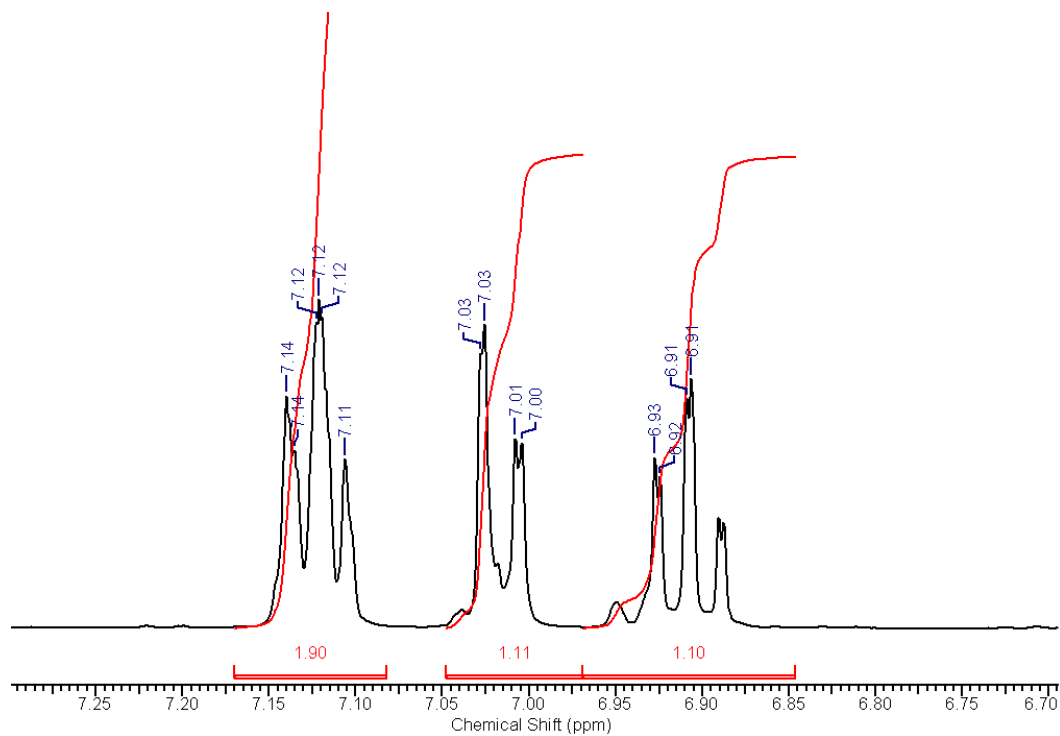

**Fig. S11**  $^1\text{H-NMR}$  spectrum of N,N-Dimethyl-o-toluidine N-oxide (Table 1, entry 4).

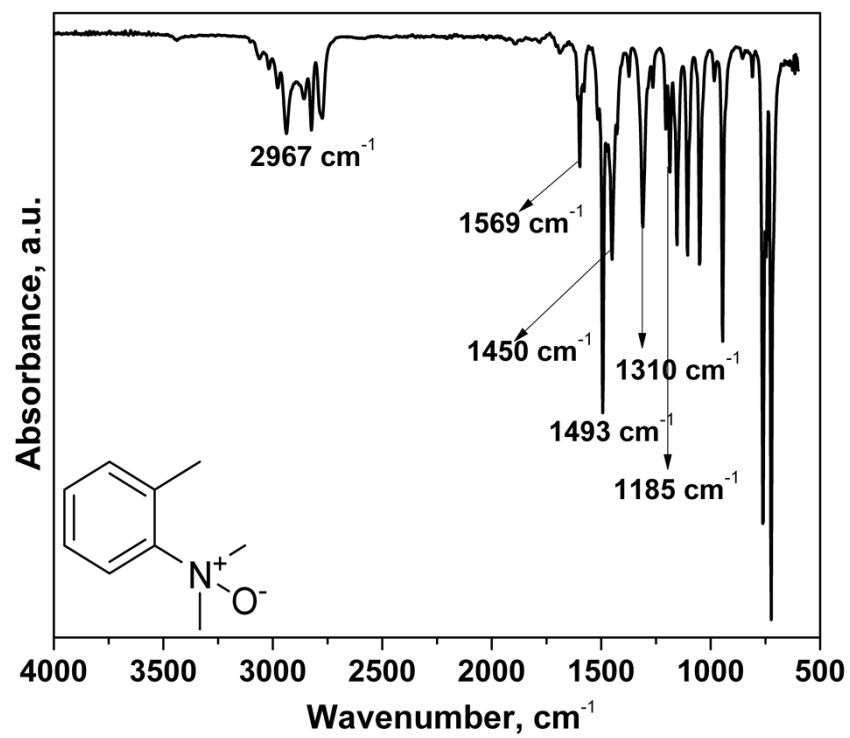

**Fig. S12** FT-IR spectrum of N,N-Dimethyl-o-toluidine N-oxide (Table 1, entry 4).

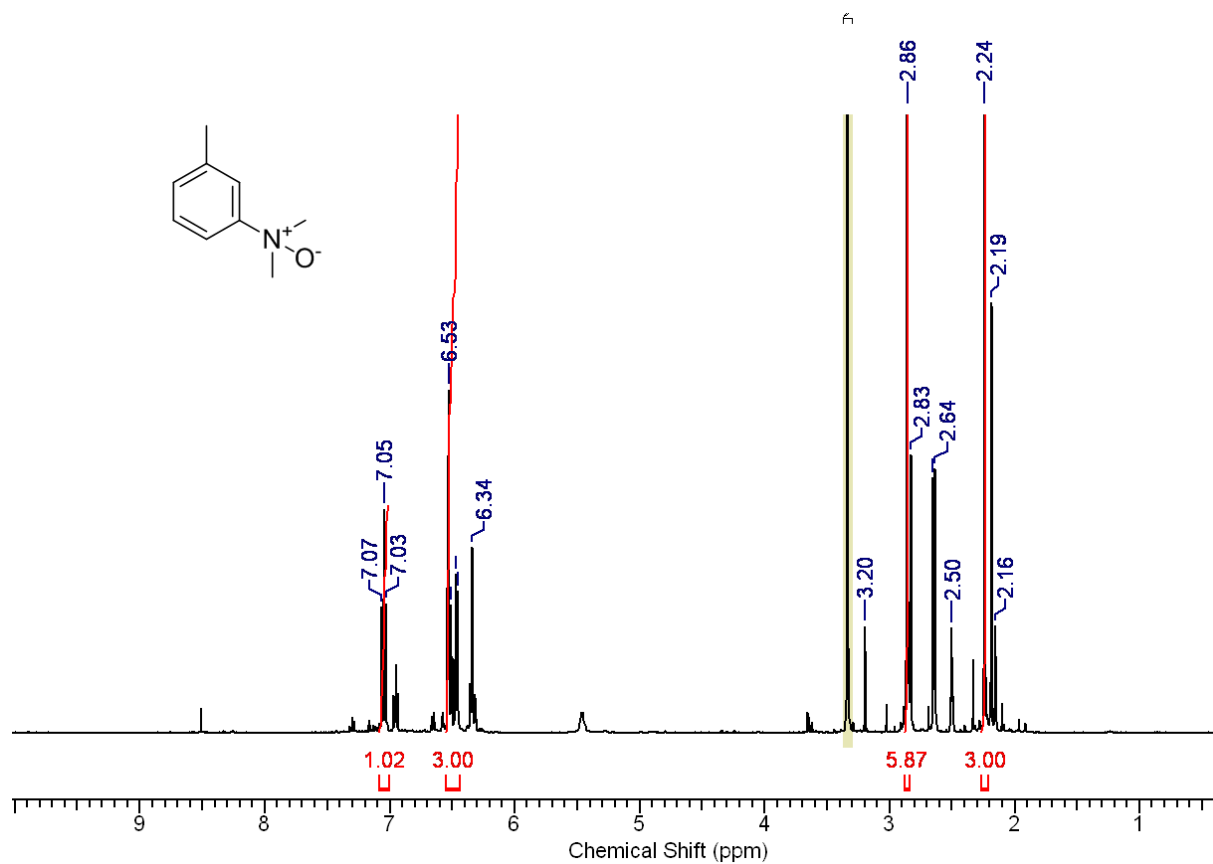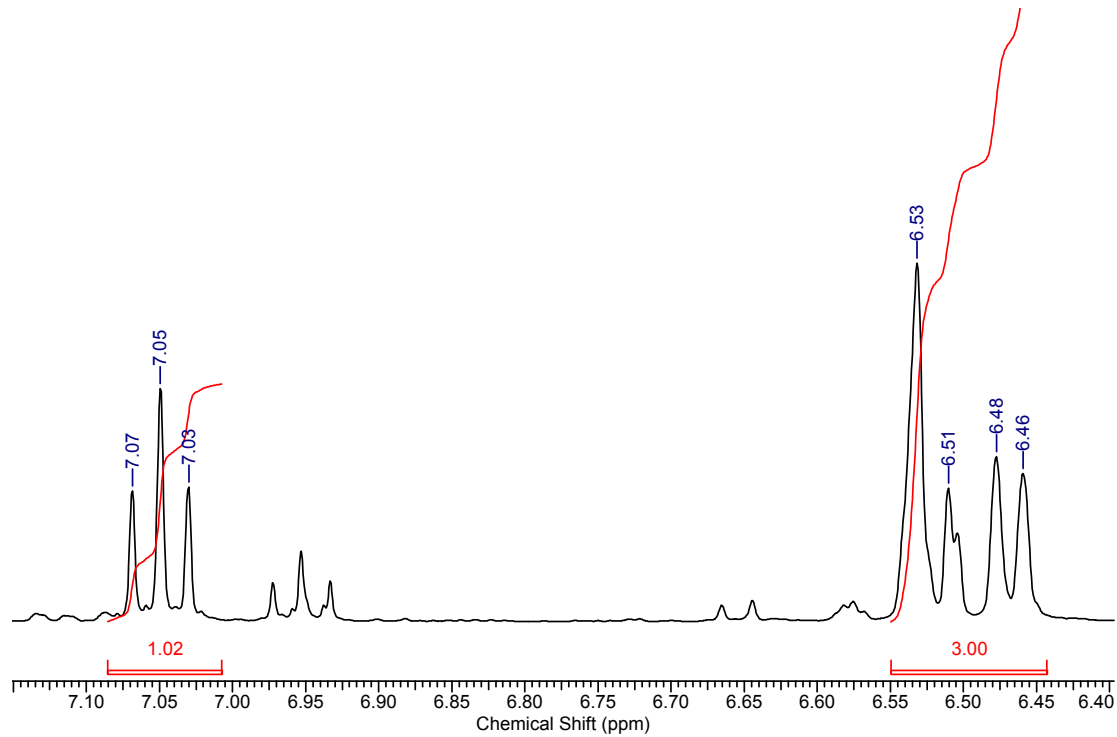

**Fig. S13**  $^1\text{H}$ -NMR spectrum of N,N-Dimethyl-m-toluidine N-oxide (Table 1, entry 5).

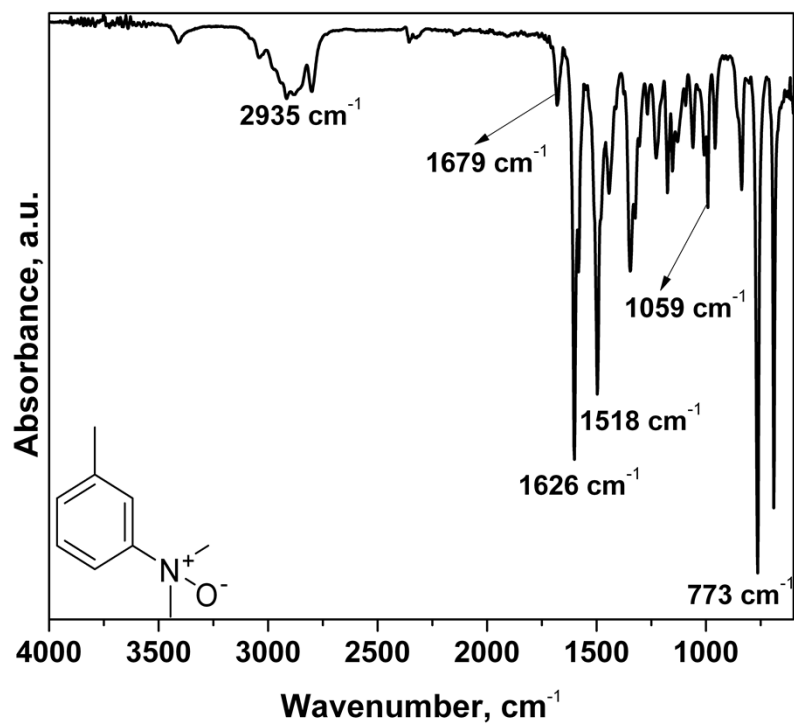

**Fig. S14** FT-IR spectrum of N,N-Dimethyl-m-toluidine N-oxide (Table 1, entry 5).

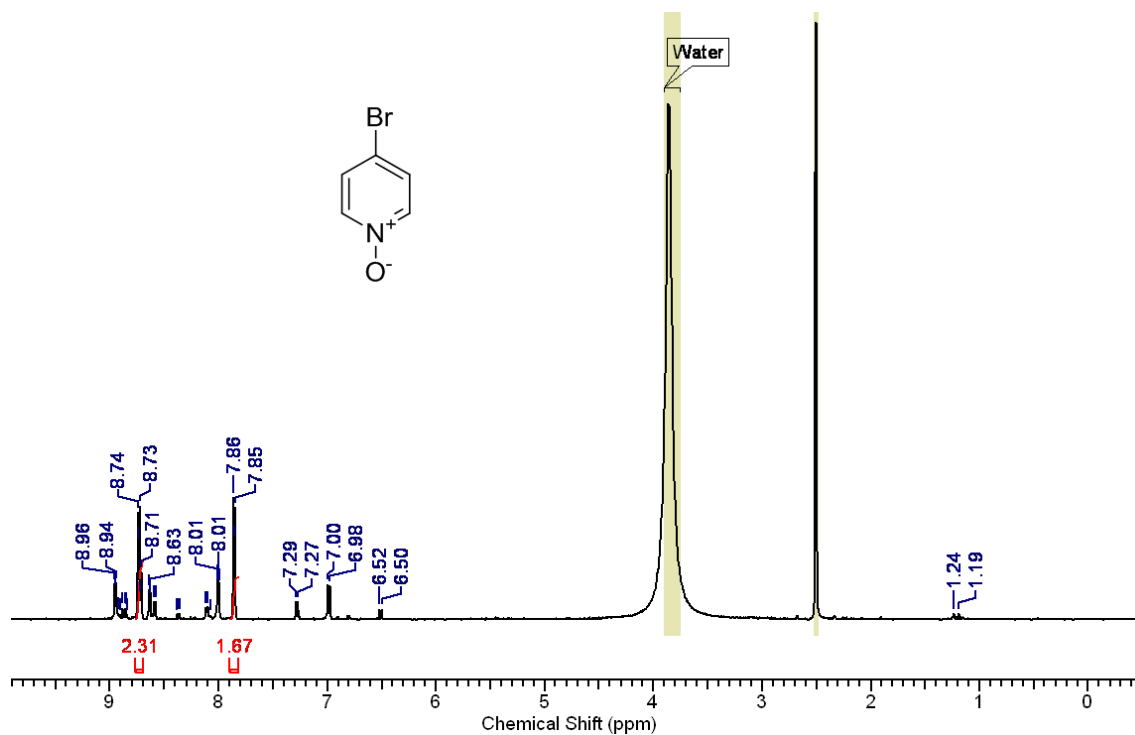

Fig. S15 <sup>1</sup>H-NMR spectrum of 4-bromopyridine N-oxide (Table 1, entry 8).

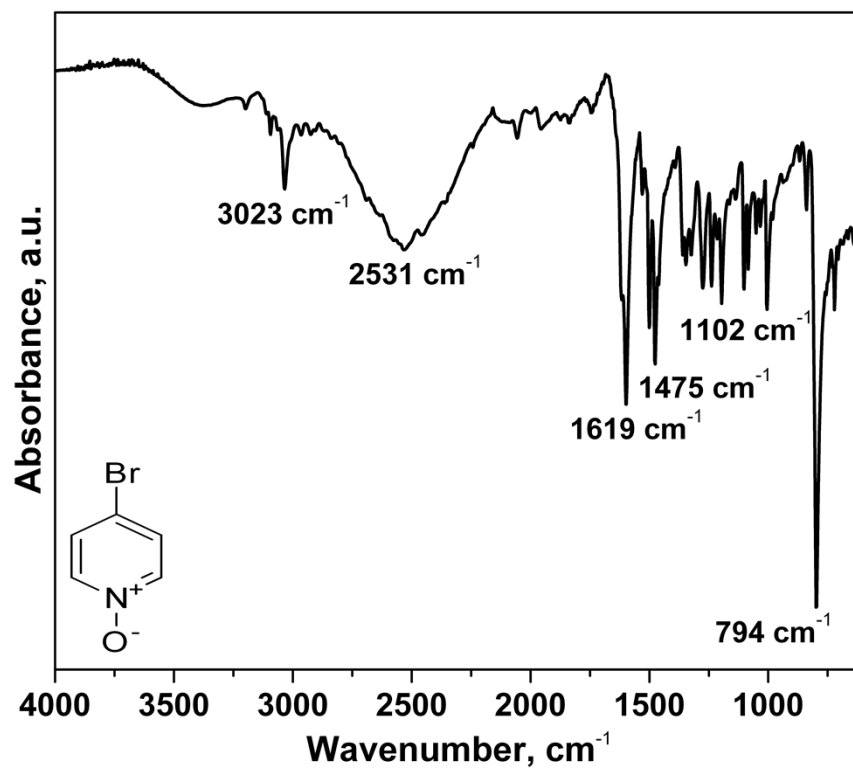

Fig. S16 FT-IR spectrum of 4-bromopyridine N-oxide (Table 1, entry 8).

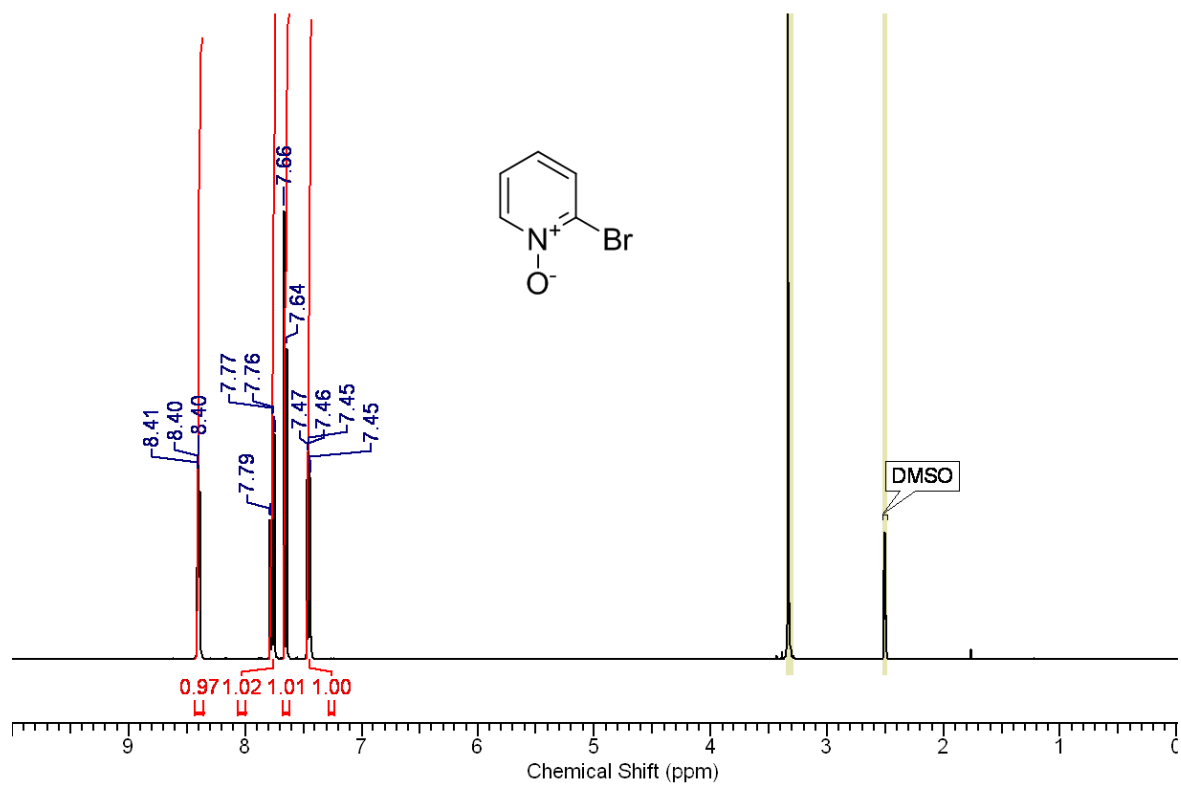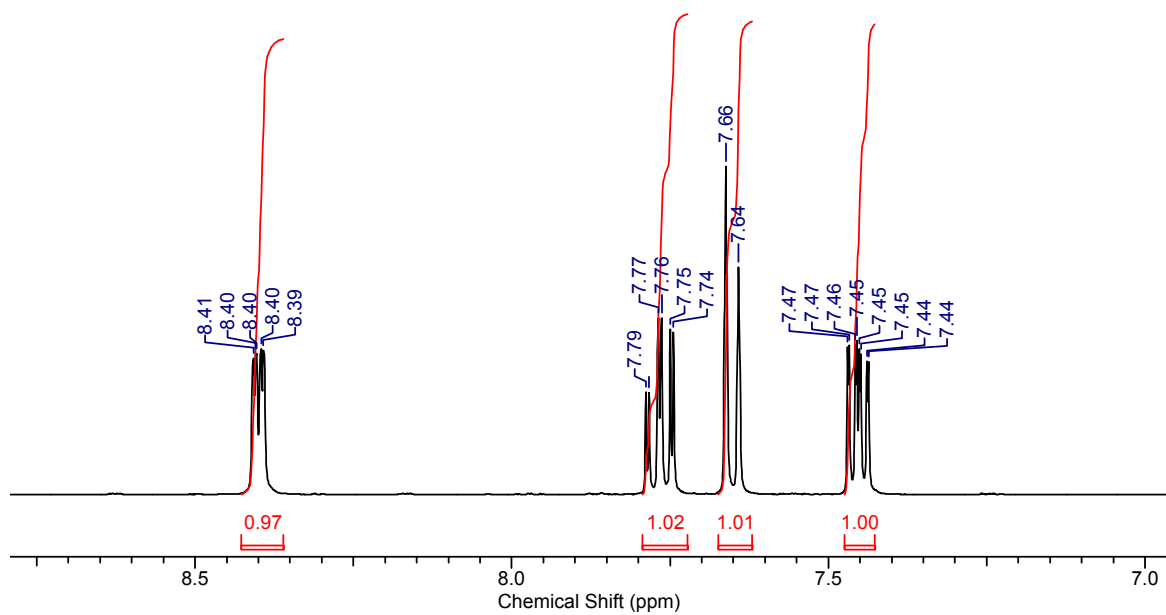

Fig. S17  $^1\text{H-NMR}$  spectrum of 2-bromopyridine oxide (Table 1, entry 9).

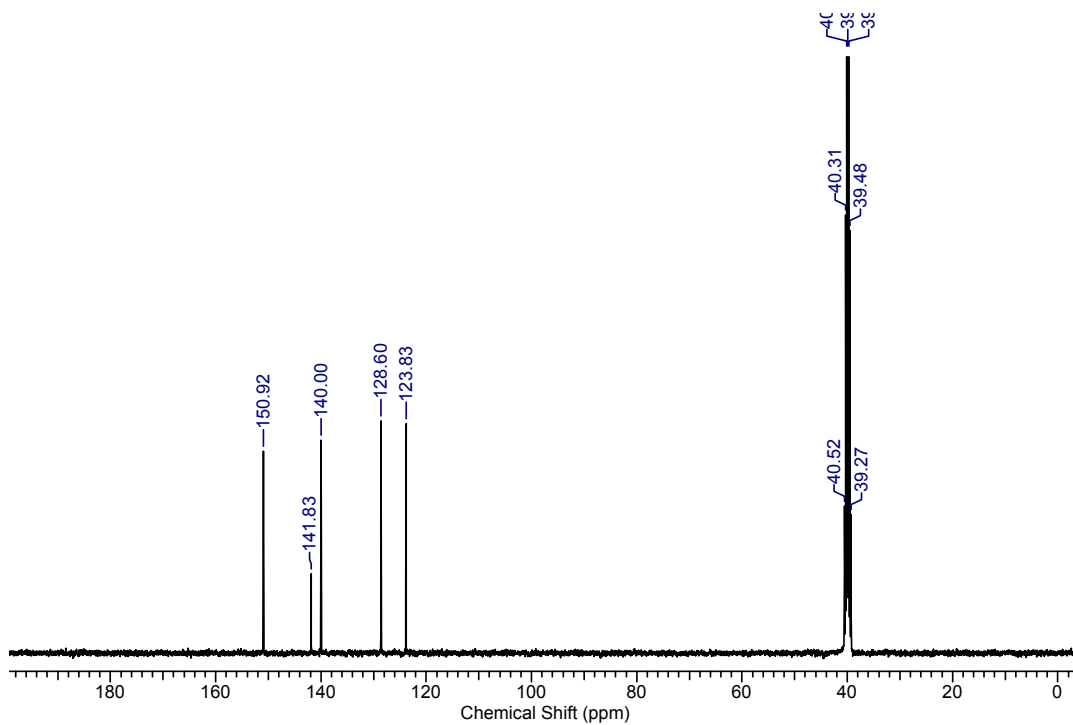

Fig. S18  $^{13}\text{C}$ -NMR spectrum of 2-bromopyridine oxide (Table 1, entry 9).

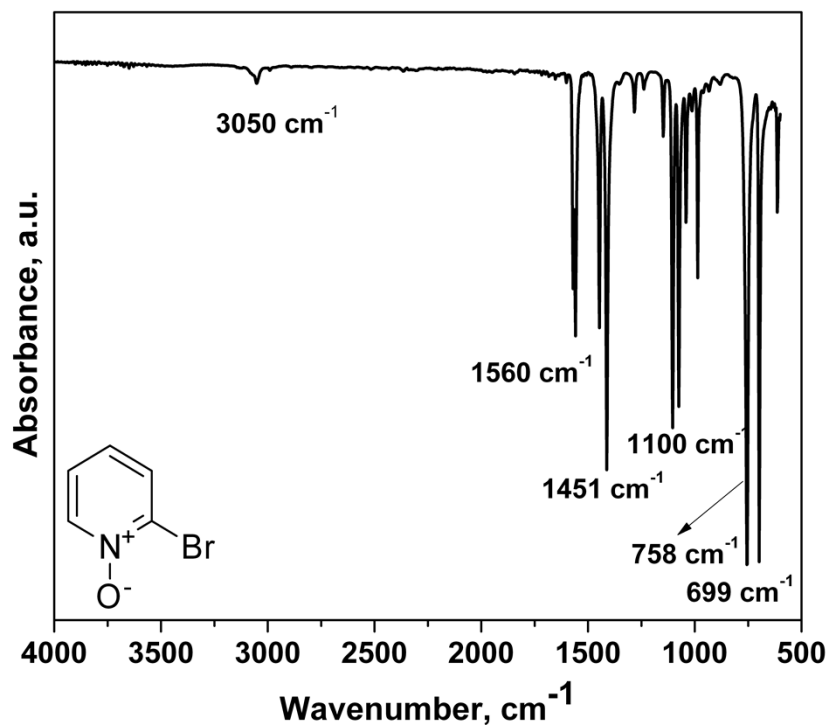

Fig. S19 FT-IR spectrum of 2-bromopyridine oxide (Table 1, entry 9).

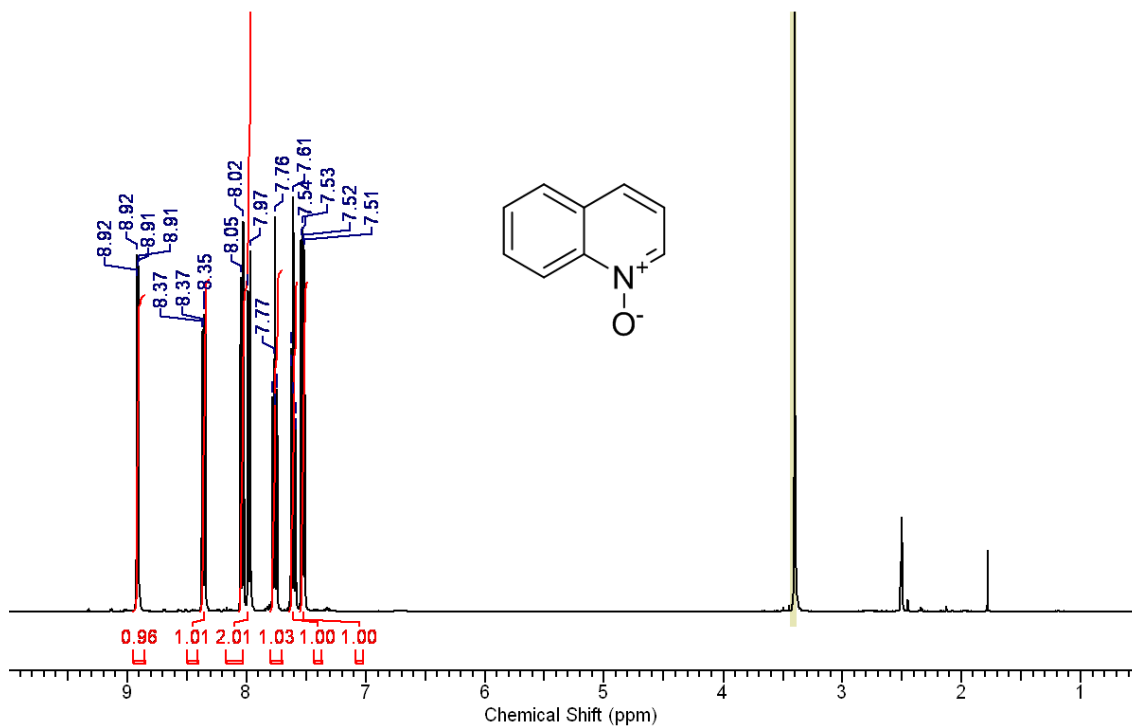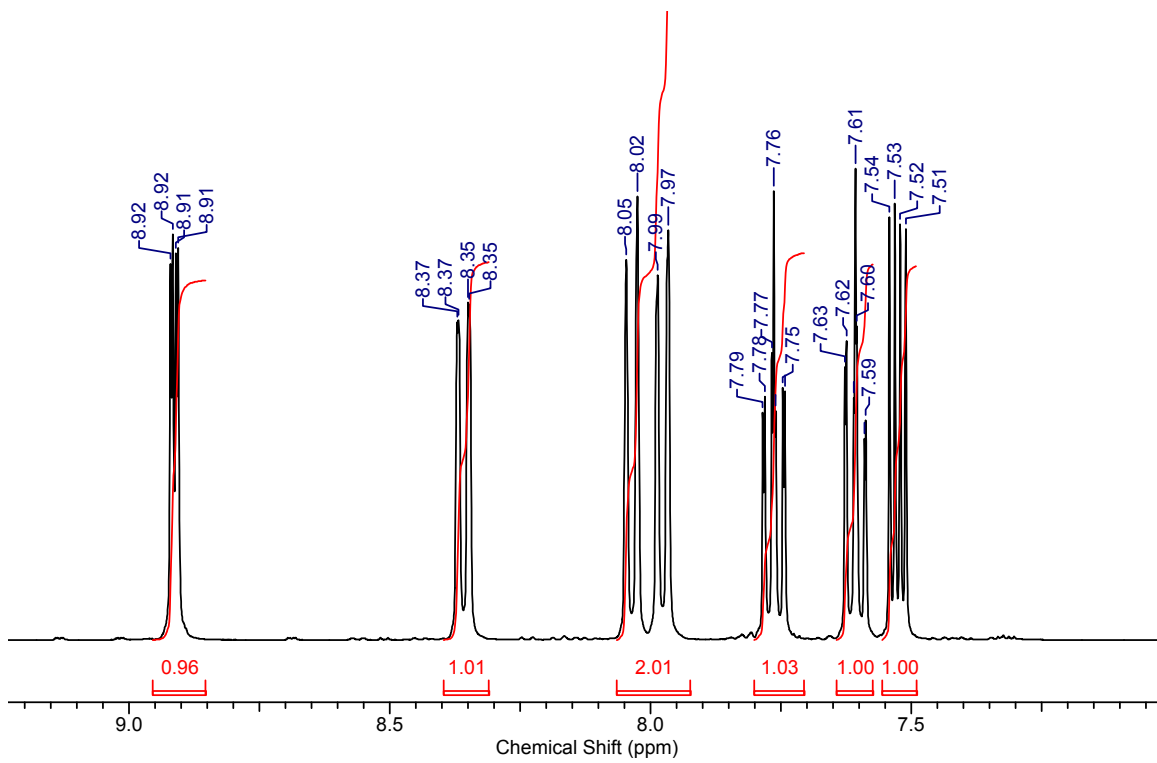

**Fig. S20**  $^1\text{H-NMR}$  spectrum of quinoline N-oxide (Table 1, entry 11).



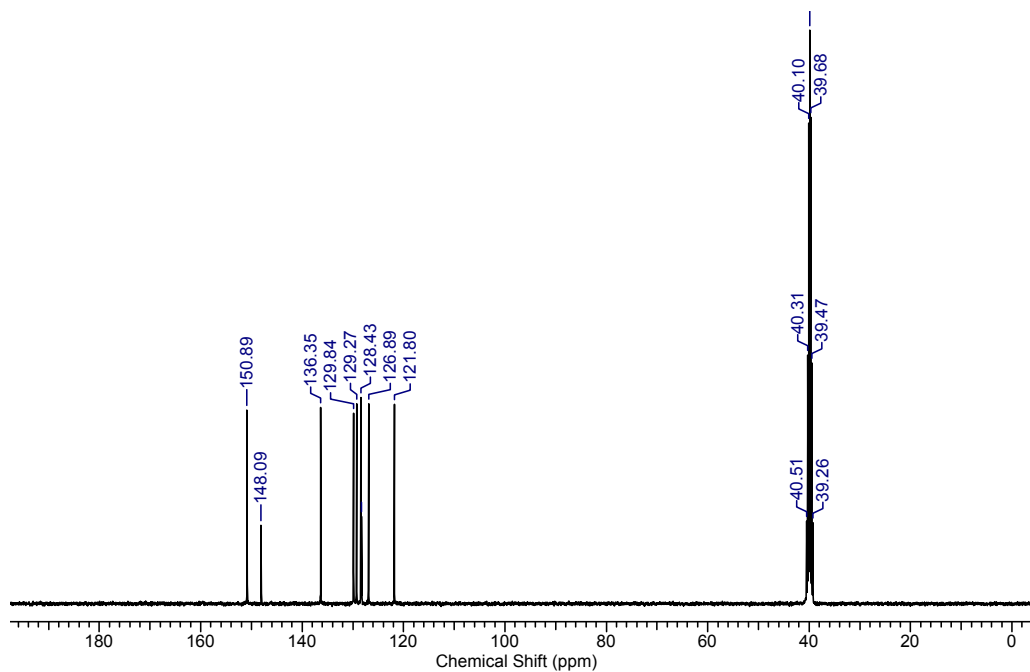

Fig. S21  $^{13}\text{C}$ -NMR spectrum of quinoline N-oxide (Table 1, entry 11).

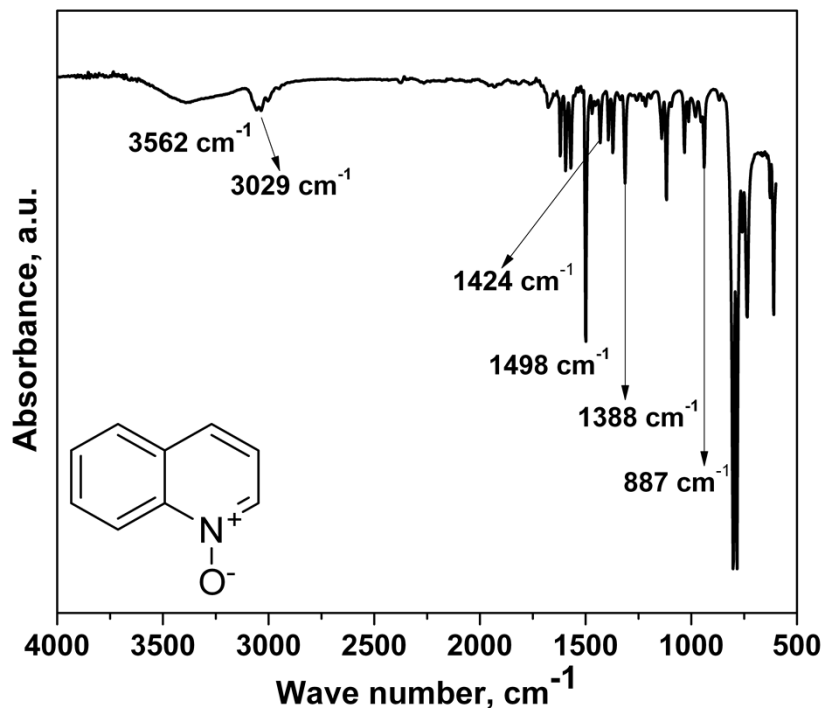

Fig. S22 FT-IR spectrum of quinoline N-oxide (Table 1, entry 11).

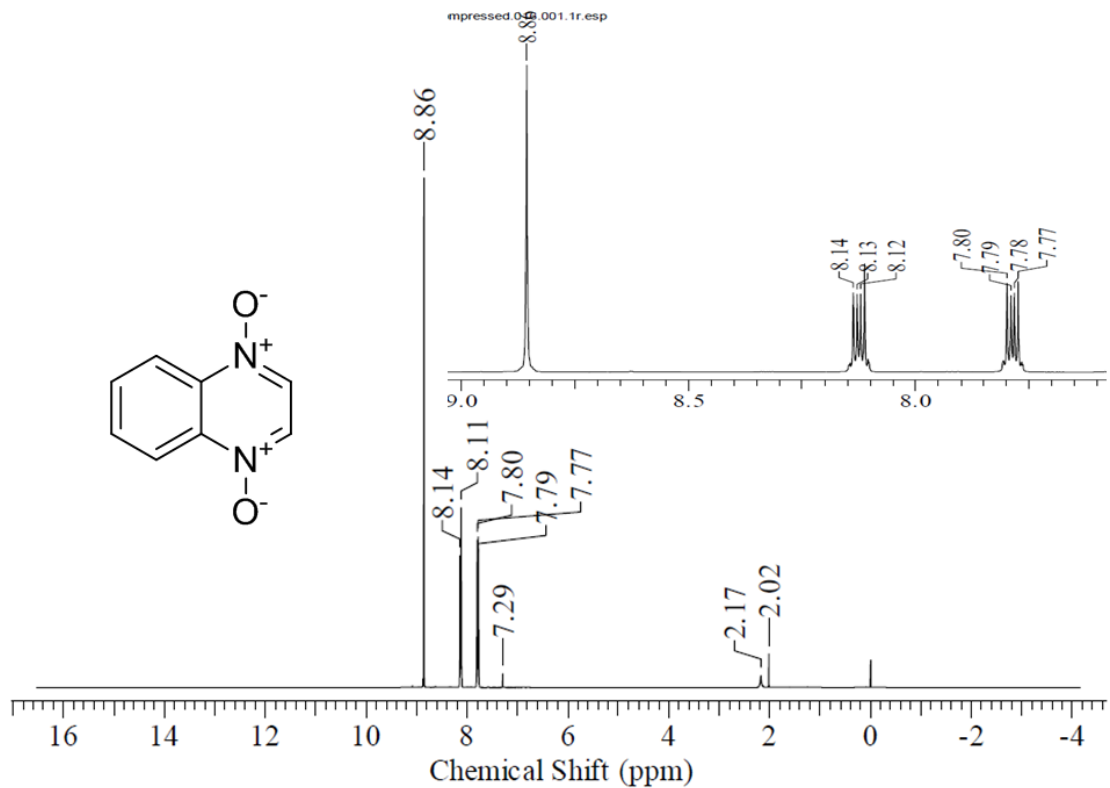

Fig. S23  $^1\text{H-NMR}$  spectrum of quinoxaline N-oxide (Table 1, entry 12).

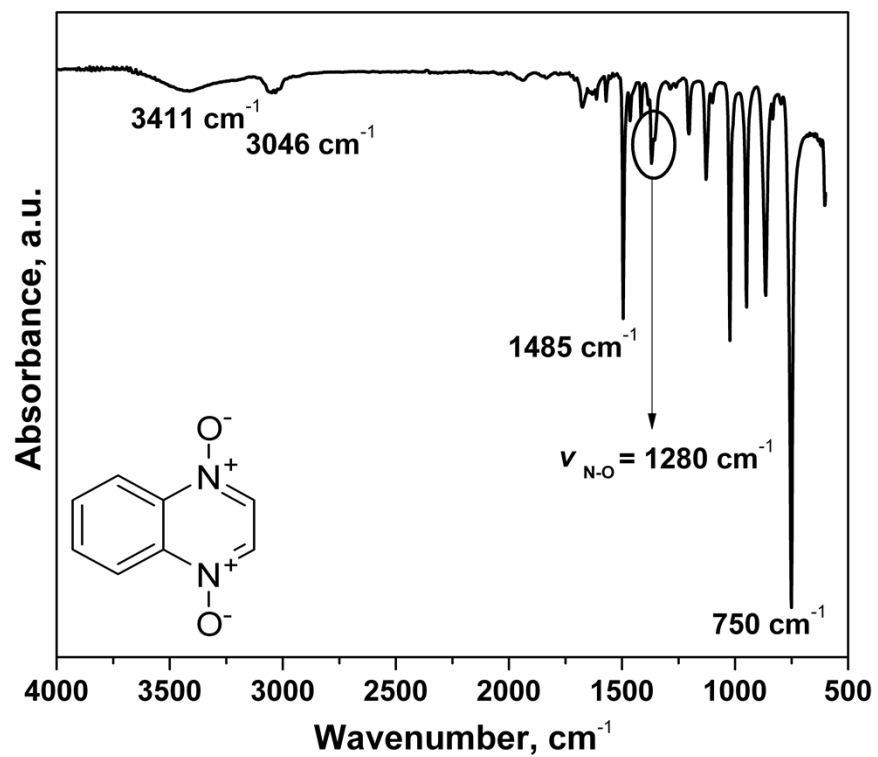

Fig. S24 FT-IR spectrum of quinoxaline N-oxide (Table 1, entry 12).

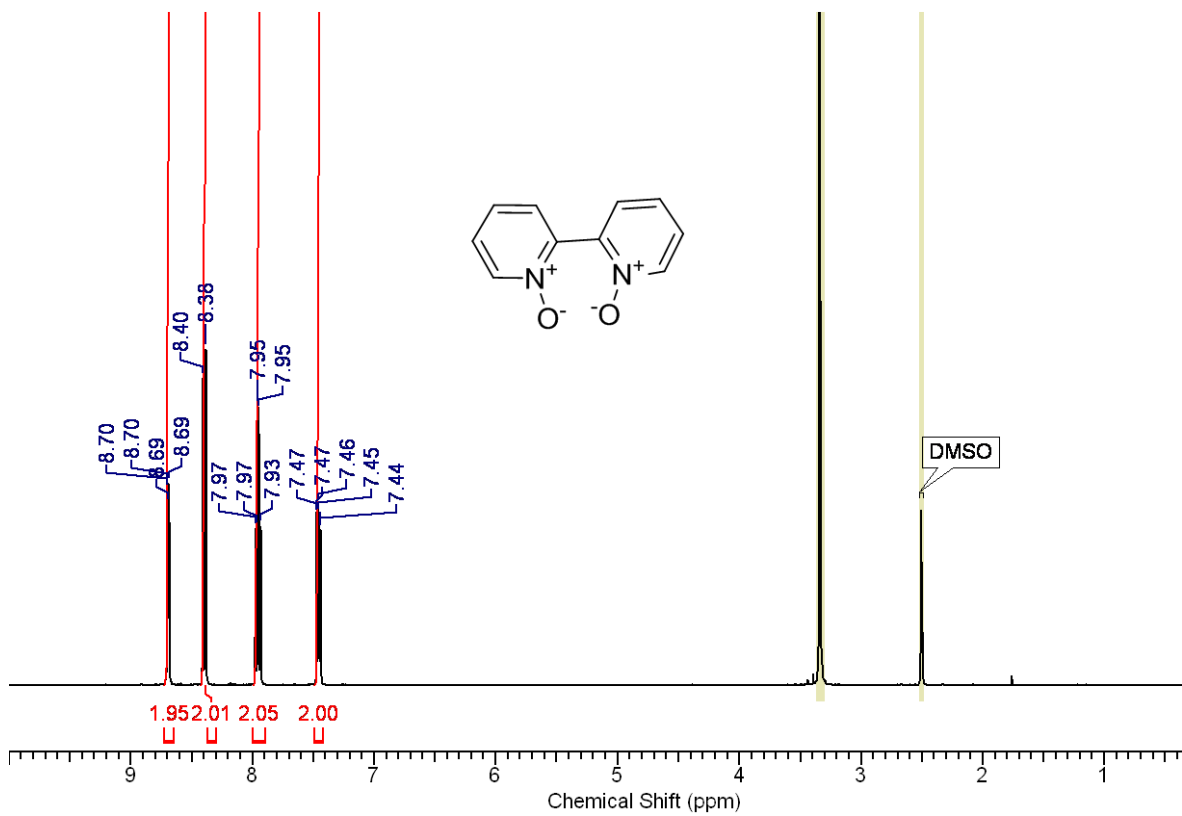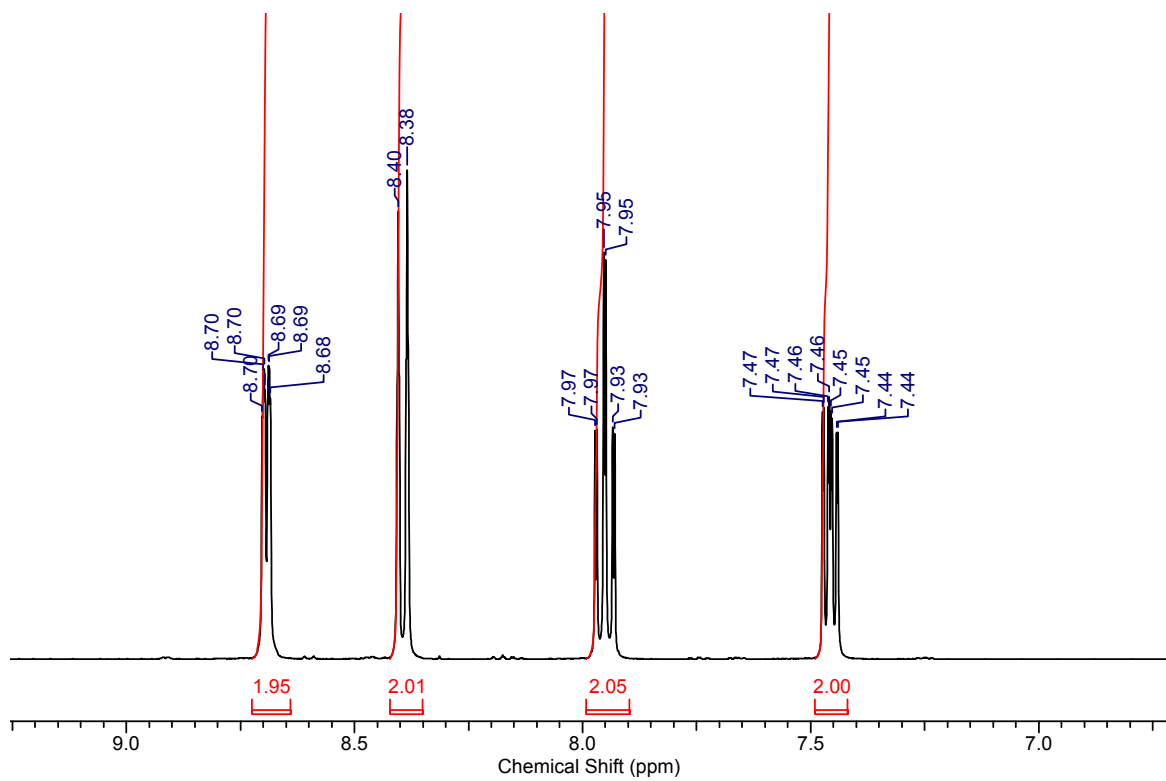

Fig. S25  $^1\text{H}$ -NMR spectrum of 2,2'-bipyridyl N-dioxide (Table 1, entry 13).

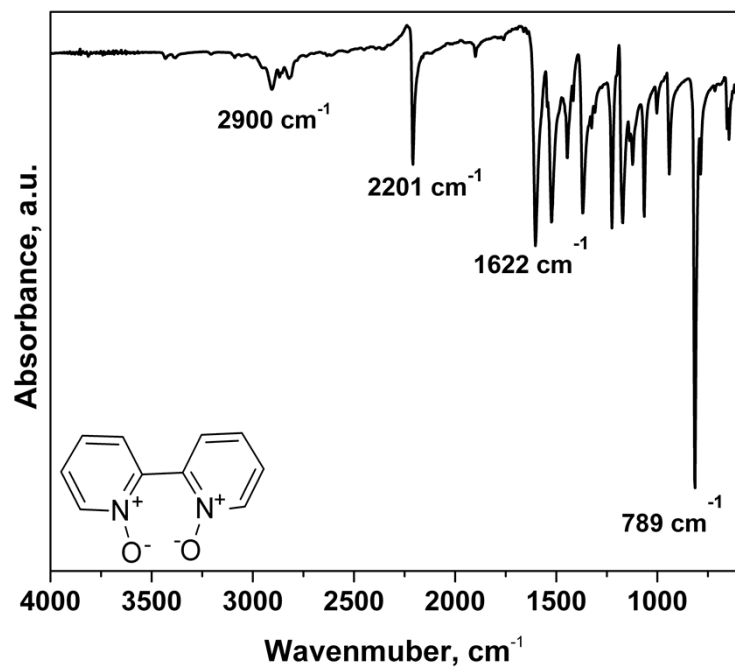

Fig. S26 FT-IR spectrum of 2,2'-bipyridyl N-dioxide (Table 1, entry 13).

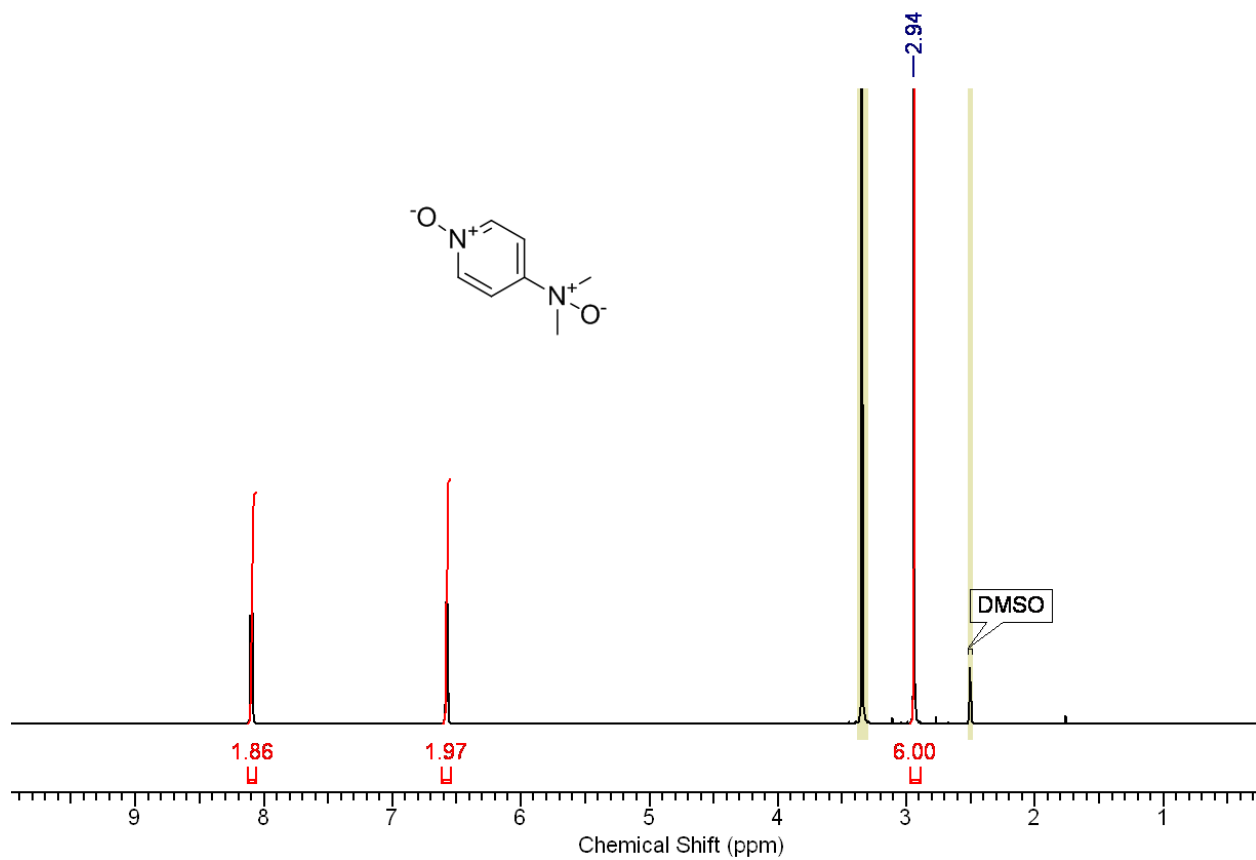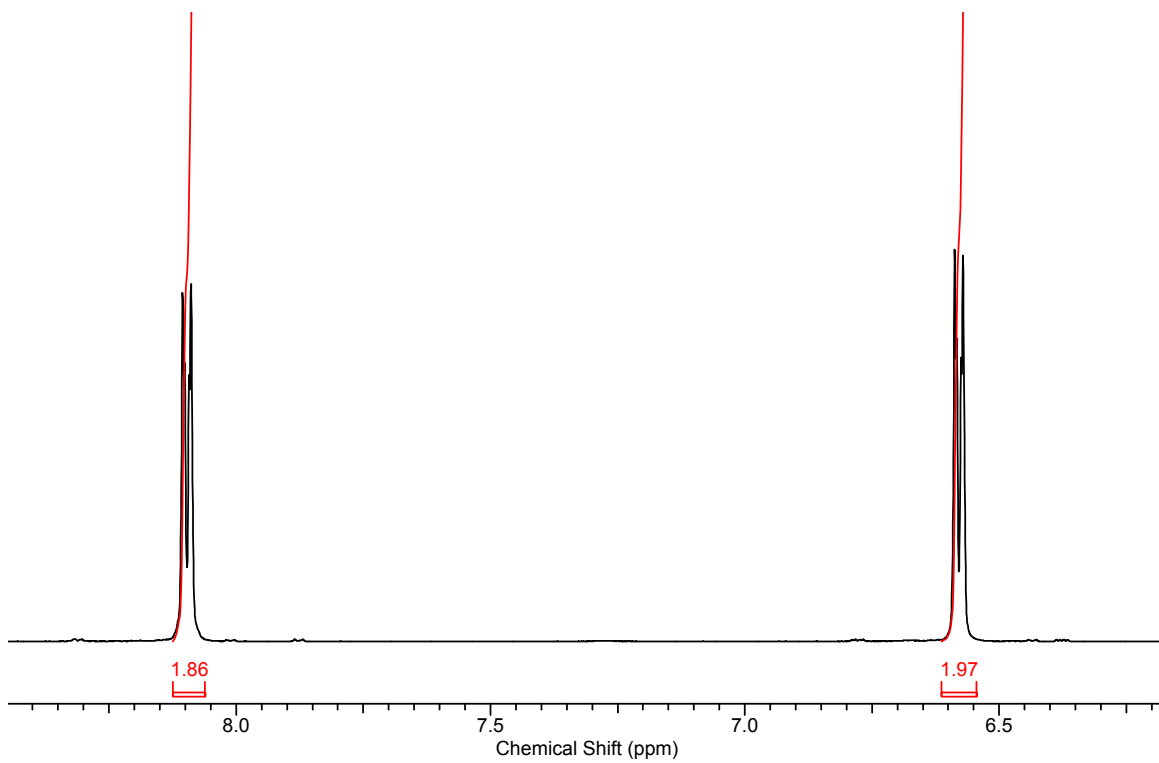

**Fig. S27**  $^1\text{H}$ -NMR spectrum of N,N-dimethylpyridin-4-amine N-dioxide (Table 1, entry 17).

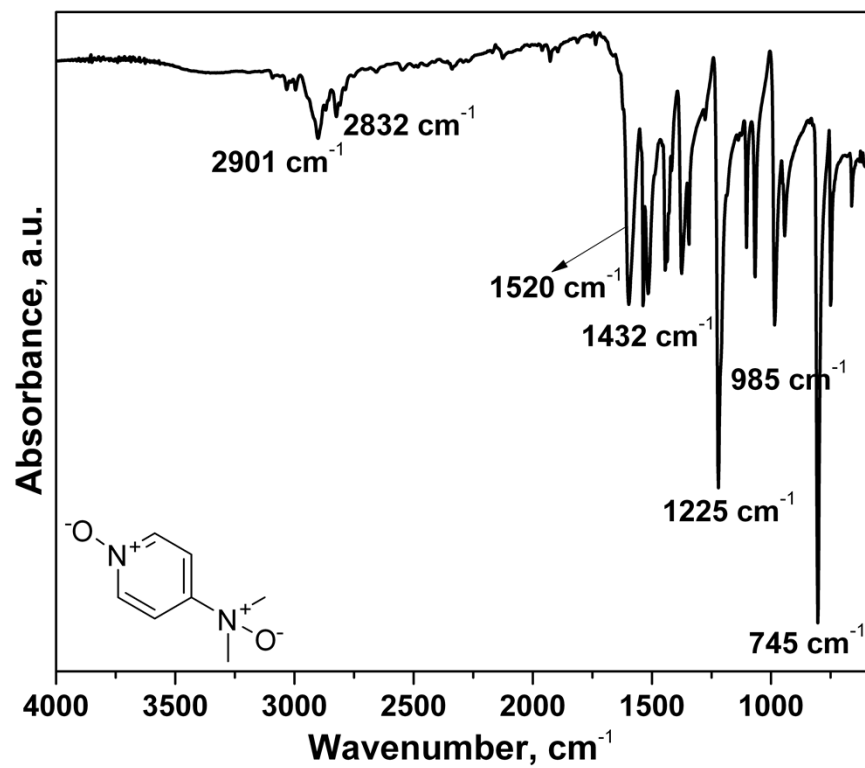

**Fig. S28** <sup>1</sup>H-NMR spectrum of N,N-dimethylpyridin-4-amine N-dioxide (Table 1, entry 17).

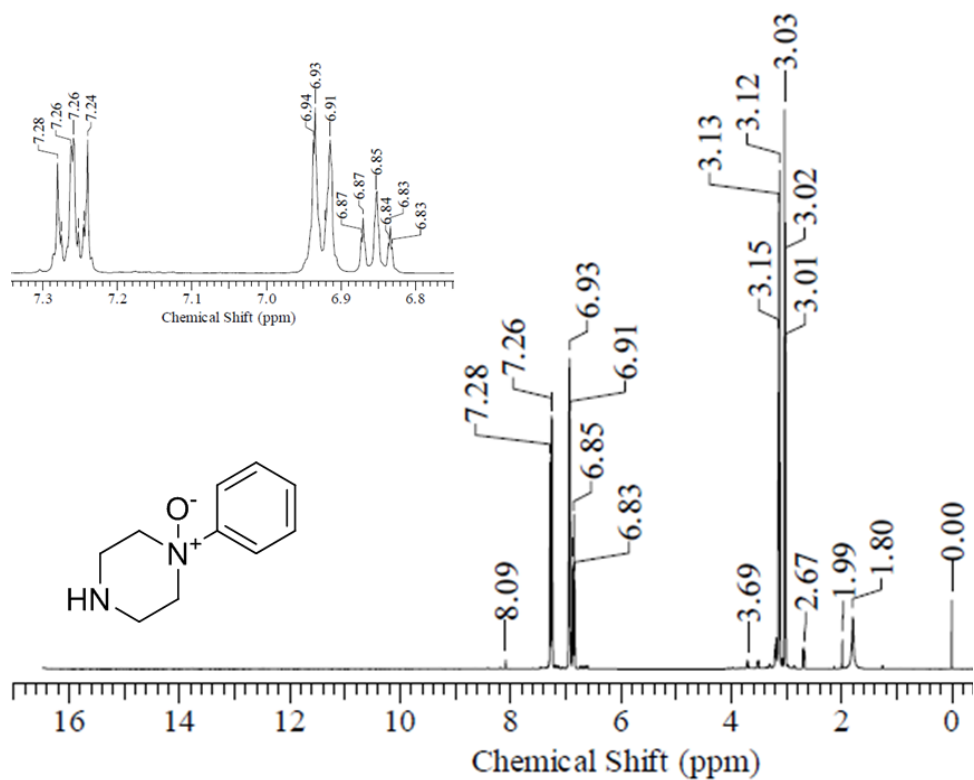

Fig. S29  $^1\text{H-NMR}$  spectrum of 1-phenylpiperazine N-dioxide (Table 1, entry 18).

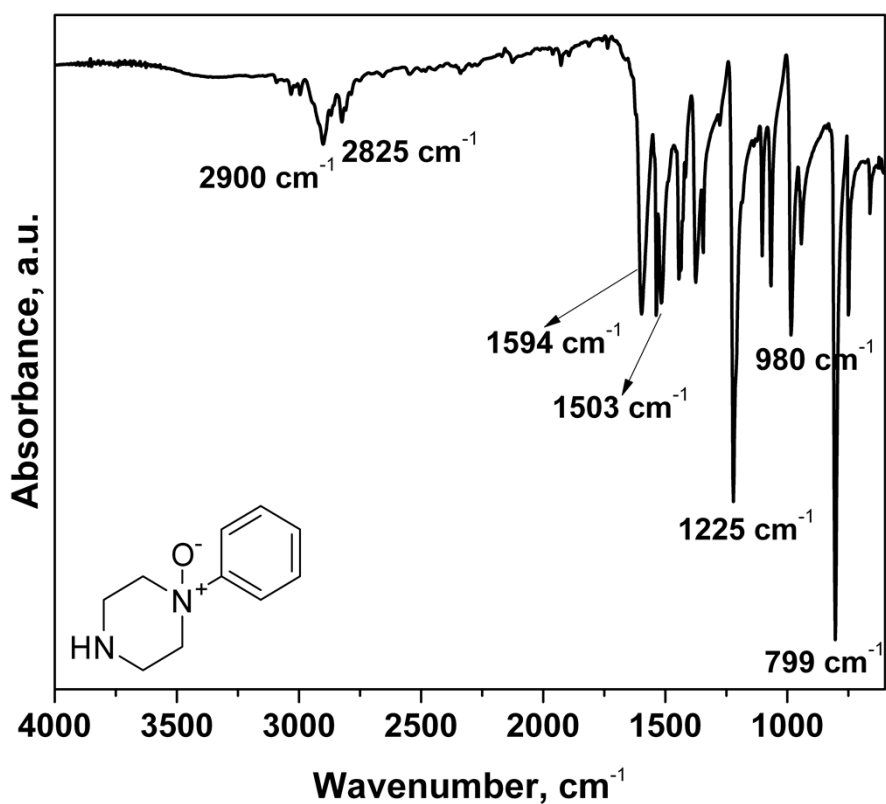

Fig. S30 FT-IR spectrum of 1-phenylpiperazine N-dioxide (Table 1, entry 18).
